# Supplementary material
Source: publisher site journal article supplement (https://www.dovepress.com/get_supplementary_file.php?f=455461.docx)
Supplement: Supplementary file 1 [file get_supplementary_file.php]

**Supplementary Materials**

**Supplementary Table 1**. Comparison of the changes in peripheral blood cell counts from baseline between the TACE alone group and the TACE+PSE group during the entire follow-up period

| **Variables** | **Time point** | **TACE alone group** | **TACE+PSE group** | ***P*** |
| --- | --- | --- | --- | --- |
| PLT, × 109/L | 1 week | 0.23 ± 23.38 | 12.21 ± 20.91 | 0.019 |
|  | 2 months | -3.17 ± 15.28 | 6.33 ± 10.75 | 0.002 |
|  | 6 months | 0.49 ± 23.01 | 16.83 ± 18.48 | 0.004 |
|  | 12 months | -0.88 ± 17.10 | 37.71 ± 25.07 | < 0.001 |
|  | 18 months | 2.57 ± 25.06 | 53.36 ± 25.25 | < 0.001 |
|  | 24 months | 1.00 ± 16.13 | 38.71 ± 20.39 | 0.002 |
| RBC, × 1012/L | 1 week | -0.27 ± 0.36 | -0.25 ± 0.30 | 0.735 |
|  | 2 months | -0.11 ± 0.44 | -0.13 ± 0.38 | 0.831 |
|  | 6 months | -0.12 ± 0.70 | 0.14 ± 0.30 | 0.046 |
|  | 12 months | -0.24 ± 0.58 | 0.21 ± 0.41 | 0.008 |
|  | 18 months | -0.58 ± 0.73 | 0.13 ± 0.56 | 0.012 |
|  | 24 months | -0.67 ± 0.49 | 0.19 ± 0.37 | < 0.001 |
| Hemoglobin, g/L | 1 week | -7.48 ± 10.42 | -6.57 ± 9.48 | 0.687 |
|  | 2 months | -3.02 ± 10.84 | -3.63 ± 11.43 | 0.822 |
|  | 6 months | -4.49 ± 17.61 | 4.91 ± 10.64 | 0.013 |
|  | 12 months | -4.84 ± 15.29 | 9.86 ± 16.58 | 0.011 |
|  | 18 months | -17.07 ± 25.10 | 10.73 ± 19.27 | 0.005 |
|  | 24 months | -18.50 ± 13.87 | 8.00 ± 8.89 | < 0.001 |
| WBC, × 109/L | 1 week | 0.88 ± 1.74 | 2.23 ± 1.65 | < 0.001 |
|  | 2 months | -0.67 ± 1.43 | 0.17 ± 0.90 | 0.003 |
|  | 6 months | 0.21 ± 2.05 | 0.71 ± 1.26 | 0.239 |
|  | 12 months | -0.06 ± 1.80 | 1.37 ± 2.59 | 0.082 |
|  | 18 months | 0.56 ± 3.81 | 1.59 ± 1.44 | 0.368 |
|  | 24 months | -0.19 ± 1.06 | 1.23 ± 0.93 | 0.009 |

Data are presented as means ± standard deviations.

Abbreviations: TACE, transarterial chemoembolization; PSE, partial splenic embolization; PLT, platelet; RBC, red blood cell; WBC, white blood cell.

**Supplementary Table 2**. Comparison of the changes in hepatic function from baseline between the TACE alone group and the TACE+PSE group during the entire follow-up period

| **Variables** | **Time point** | **TACE alone group** | **TACE+PSE group** | ***P*** |
| --- | --- | --- | --- | --- |
| Child-Pugh score | 1 week | 0.63 ± 0.80 | 0.79 ± 1.29 | 0.568 |
|  | 2 months | 0.38 ± 1.38 | 0.31 ± 1.46 | 0.831 |
|  | 6 months | 0.31 ± 1.55 | -0.09 ± 1.27 | 0.294 |
|  | 12 months | 0.96 ± 1.87 | -0.43 ± 1.50 | 0.019 |
|  | 18 months | 1.67 ± 1.61 | -0.40 ± 1.43 | 0.005 |
|  | 24 months | 1.33 ± 1.67 | -0.14 ± 1.57 | 0.075 |
| Total bilirubin, μmol/L | 1 week | 5.77 ± 12.05 | 6.33 ± 21.12 | 0.898 |
|  | 2 months | 2.27 ± 17.74 | -2.57 ± 12.58 | 0.181 |
|  | 6 months | 9.53 ± 37.85 | 8.47 ± 47.58 | 0.930 |
|  | 12 months | 23.43 ± 82.32 | 5.30 ± 30.71 | 0.348 |
|  | 18 months | 2.58 ± 9.33 | -6.55 ± 22.56 | 0.258 |
|  | 24 months | 9.83 ± 18.06 | -4.10 ± 12.76 | 0.067 |
| Albumin, g/L | 1 week | -2.81 ± 3.10 | -3.35 ± 3.67 | 0.506 |
|  | 2 months | -1.35 ± 4.13 | -2.10 ± 4.59 | 0.492 |
|  | 6 months | -0.81 ± 5.44 | -0.75 ± 4.08 | 0.962 |
|  | 12 months | -2.27 ± 5.62 | 0.23 ± 4.23 | 0.135 |
|  | 18 months | -4.43 ± 3.05 | 0.13 ± 6.88 | 0.076 |
|  | 24 months | -3.58 ± 4.55 | 1.37 ± 5.38 | 0.066 |
| Log ALT, U/L | 1 week | 0.42 ± 0.73 | 0.20 ± 0.69 | 0.189 |
|  | 2 months | -0.10 ± 0.83 | -0.01 ± 0.55 | 0.573 |
|  | 6 months | -0.13 ± 0.68 | 0.00 ± 0.87 | 0.535 |
|  | 12 months | 0.35 ± 0.98 | 0.16 ± 0.96 | 0.563 |
|  | 18 months | 0.43 ± 1.32 | -0.19 ± 0.64 | 0.172 |
|  | 24 months | -0.20 ± 0.51 | -0.20 ± 0.52 | 0.979 |
| Log AST, U/L | 1 week | 0.13 ± 0.57 | 0.09 ± 0.49 | 0.733 |
|  | 2 months | -0.04 ± 0.65 | 0.07 ± 0.55 | 0.435 |
|  | 6 months | -0.06 ± 0.45 | 0.02 ± 0.77 | 0.658 |
|  | 12 months | 0.35 ± 1.00 | 0.03 ± 1.12 | 0.389 |
|  | 18 months | 0.65 ± 1.51 | -0.01 ± 0.59 | 0.185 |
|  | 24 months | 0.20 ± 0.60 | -0.18 ± 0.47 | 0.143 |

Data are presented as means ± standard deviations.

Abbreviations: TACE, transarterial chemoembolization; PSE, partial splenic embolization; ALT, alanine aminotransferase; AST, aspartate aminotransferase.
